# Supplementary material
Source: MDPI journal article supplement (https://www.mdpi.com/2073-4468/13/2/33)
Supplement: s1 [file s1]

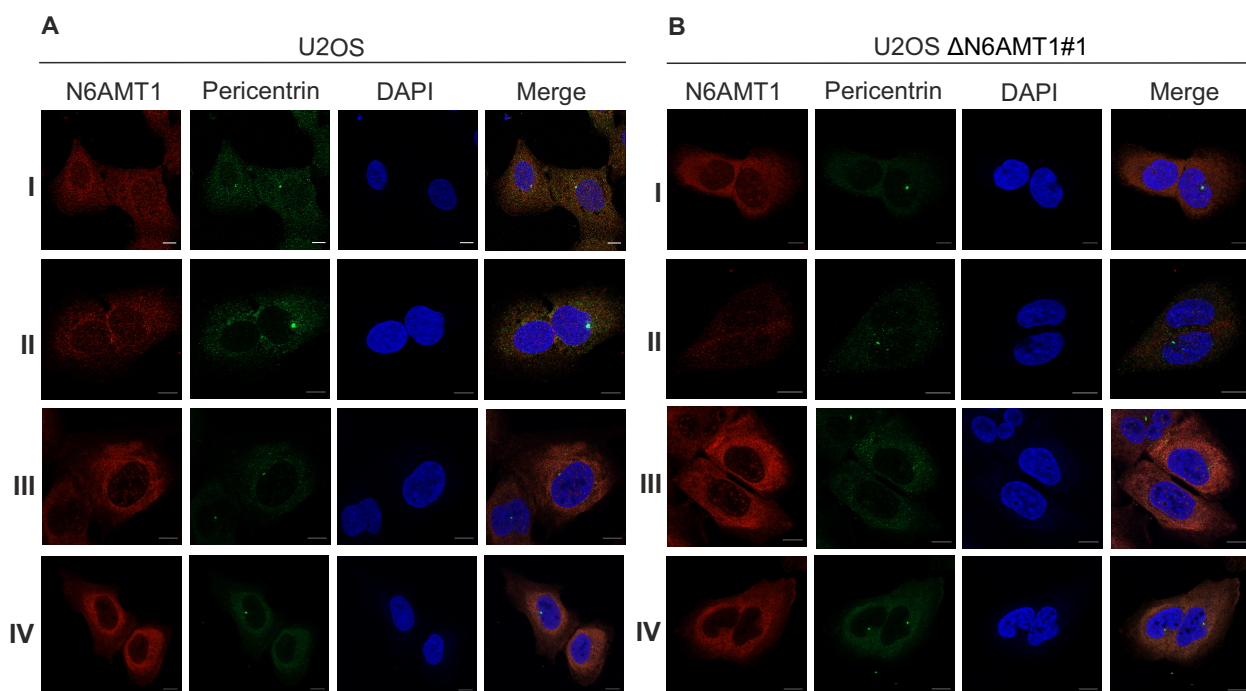

**Figure S1.** The target of the N6AMT1 antibody localizes in the cytoplasm during interphase. a. U2OS cells, interphase; b. N6AMT1 knockout cells  $\Delta$ N6AMT1#1, interphase, processed for immunofluorescence with primary antibodies specific to N6AMT1: I (CQ1550), II (HPA059242), III (6211-1-AP) and IV (PA5-121076); pericentrin and secondary antibodies conjugated with Alexa-568 and Alexa 488. The cells were then counterstained with DAPI for DNA labelling. Images were captured using a Zeiss LSM 900 confocal microscope at 63 $\times$  magnification. Scale bar, 10  $\mu$ m.

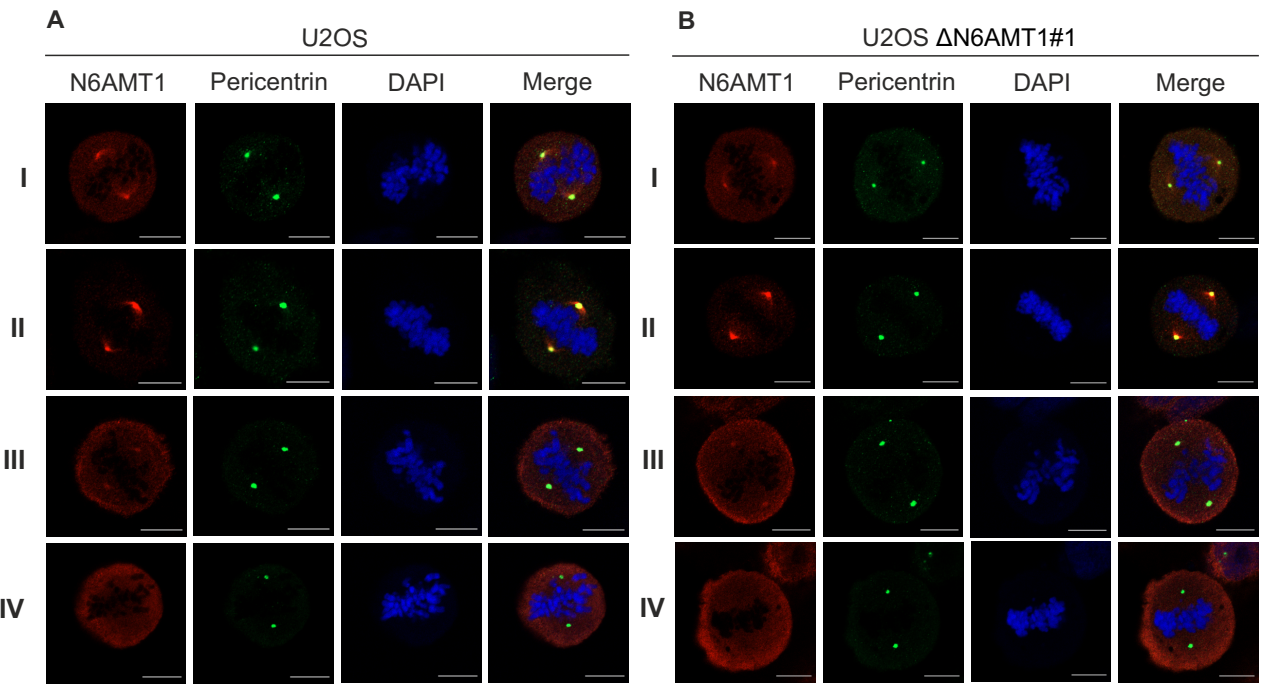

**Figure S2.** The target of the N6AMT1 antibody localises at the centrosomes during mitosis. a. U2OS cells, interphase; b. N6AMT1 knockout cells  $\Delta$ N6AMT1#1, interphase, processed for immunofluorescence with primary antibodies specific to N6AMT1: I (CQ1550), II (HPA059242), III (6211-1-AP) and IV (PA5-121076); pericentrin and secondary antibodies conjugated with Alexa-568 and Alexa 488. The cells were then counterstained with DAPI for DNA labelling. Images were captured using a Zeiss LSM 900 confocal microscope at 63 $\times$  magnification. Scale bar, 10  $\mu$ m.

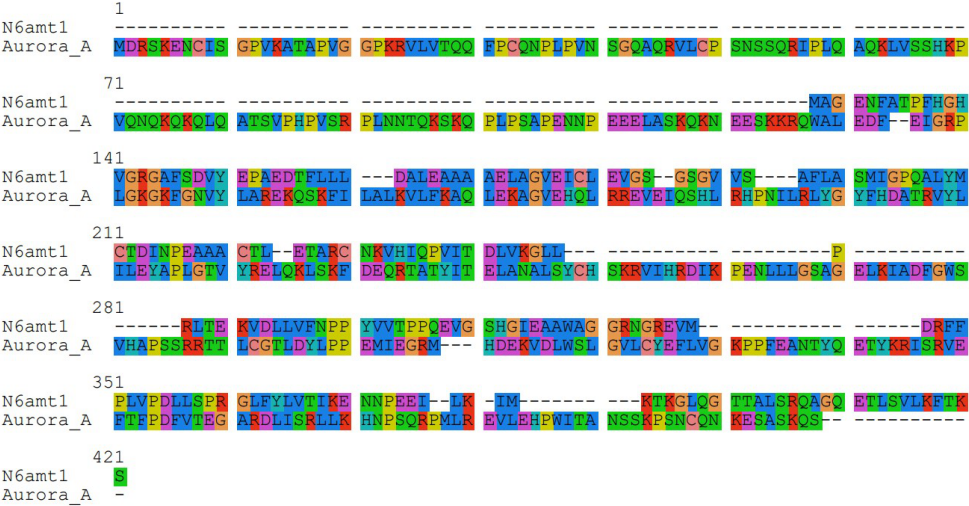

**Figure S3.** N6AMT1 and AURKA sequence alignment. BlastP sequence alignment tool with the default parameters was used to align AURKA (Uniprot accession O14965) and N6AMT1 (Uniprot accession Q9Y5N5). Small motifs were separately aligned with the flanking sequence of N6AMT1 against AURKA, using ClustalΩ ver. 1.2.2 with default options in SeaView ver. 4.7.

**Table S1.** Summary of immunoprecipitated proteins by N6AMT1 antibody CQ1550 identified by mass spectrometry analysis.

| Protein names                                                   | Peptides | Mol. weigh | Intensity |
|-----------------------------------------------------------------|----------|------------|-----------|
| Plectin                                                         | 92       | 531,8      | 5,50E+09  |
| Isoform 4 of Plectin                                            | 91       | 516,2      | 6,27E+07  |
| Vimentin                                                        | 62       | 53,7       | 1,06E+11  |
| Albumin                                                         | 61       | 69,3       | 7,31E+10  |
| Isoform 2 of Keratin, type II cytoskeletal 8                    | 52       | 56,6       | 5,55E+10  |
| Actin, cytoplasmic 1                                            | 45       | 41,7       | 2,66E+11  |
| Actin, cytoplasmic 2                                            | 45       | 41,8       | 6,46E+09  |
| Myosin-9                                                        | 45       | 226,5      | 3,07E+09  |
| Keratin, type II cytoskeletal 1                                 | 43       | 66,0       | 1,21E+10  |
| Keratin, type II cytoskeletal 2 epidermal                       | 42       | 65,4       | 4,35E+09  |
| Keratin, type I cytoskeletal 18                                 | 39       | 48,1       | 4,67E+10  |
| Keratin, type I cytoskeletal 17                                 | 37       | 48,1       | 2,08E+10  |
| Isoform 2 of Tropomyosin beta chain                             | 34       | 33,0       | 8,87E+09  |
| Keratin, type I cytoskeletal 14                                 | 34       | 51,6       | 5,29E+09  |
| Beta tropomyosin isoform                                        | 34       | 33,0       | 1,60E+07  |
| Keratin, type II cytoskeletal 5                                 | 33       | 62,4       | 1,80E+09  |
| Tropomyosin beta chain                                          | 32       | 32,8       | 3,46E+08  |
| Keratin, type I cytoskeletal 10                                 | 31       | 59,5       | 1,95E+10  |
| Keratin, type II cytoskeletal 75                                | 31       | 59,6       | 1,78E+09  |
| Keratin, type I cytoskeletal 16                                 | 28       | 51,3       | 5,46E+08  |
| Aurora kinase A                                                 | 27       | 45,8       | 3,57E+09  |
| Actin, alpha cardiac muscle 1                                   | 26       | 42,0       | 4,94E+09  |
| Keratin, type II cytoskeletal 6A                                | 26       | 60,0       | 4,60E+08  |
| Tubulin beta-4B chain                                           | 23       | 49,8       | 1,81E+10  |
| Tubulin alpha-1B chain                                          | 23       | 50,2       | 1,45E+10  |
| Tubulin beta chain                                              | 23       | 47,8       | 4,31E+09  |
| Isoform 3 of Coronin-1C                                         | 23       | 58,9       | 1,88E+09  |
| Isoform 2 of Keratin, type II cytoskeletal 80                   | 23       | 50,5       | 1,49E+09  |
| Tubulin beta-6 chain                                            | 22       | 49,9       | 2,92E+09  |
| Tubulin alpha-1A chain                                          | 21       | 50,1       | 4,87E+08  |
| Tubulin beta-2B chain                                           | 21       | 50,0       | 1,29E+08  |
| Tubulin alpha chain                                             | 21       | 57,7       | 8,72E+07  |
| Tubulin beta-2A chain                                           | 21       | 49,9       | 2,77E+07  |
| Isoform 2 of ATP synthase subunit alpha, mitochondria           | 20       | 54,5       | 1,38E+09  |
| G_PROTEIN_RECEP_F1_2 domain-containing protein                  | 20       | 88,4       | 1,27E+08  |
| Tubulin alpha-3D chain                                          | 19       | 50,0       | 1,82E+08  |
| Keratin, type I cytoskeletal 9                                  | 18       | 62,1       | 2,36E+09  |
| 60S ribosomal protein L4                                        | 17       | 47,7       | 1,09E+09  |
| Beta-lactoglobulin                                              | 16       | 18,3       | 3,48E+10  |
| Serine/threonine-protein phosphatase PP1-alpha catalytic        | 16       | 37,5       | 1,37E+09  |
| 60S ribosomal protein L3                                        | 16       | 46,1       | 8,64E+08  |
| Zinc finger protein 185                                         | 16       | 73,5       | 7,11E+08  |
| Isoform 3 of Tropomyosin alpha-1 chain                          | 16       | 32,9       | 5,19E+08  |
| Alpha-S2-casein                                                 | 15       | 24,3       | 2,67E+10  |
| Drebrin                                                         | 15       | 71,4       | 9,81E+08  |
| Isoform Alpha of LIM domain and actin-binding protein           | 15       | 67,1       | 5,72E+08  |
| Serine/threonine-protein phosphatase PP1-beta catalytic         | 15       | 37,2       | 4,26E+08  |
| Beta-actin-like protein 2                                       | 15       | 42,0       | 9,25E+07  |
| Tropomodulin-3                                                  | 14       | 39,6       | 1,54E+09  |
| Putative elongation factor 1-alpha-like 3                       | 14       | 50,2       | 1,42E+09  |
| Isoform 4 of Leucine-rich repeat flightless-interacting protein | 14       | 48,3       | 8,53E+08  |
| ATP synthase subunit beta (Fragment)                            | 14       | 38,1       | 5,42E+08  |
| Keratin, type I cytoskeletal 18                                 | 14       | 47,5       | 2,02E+08  |
| Albumin (Fragment)                                              | 13       | 51,5       | 3,42E+09  |
| Nestin                                                          | 13       | 177,4      | 8,33E+08  |
| Actin-related protein 3                                         | 13       | 47,4       | 6,02E+08  |
| Protein phosphatase 1 regulatory subunit 12A                    | 13       | 115,3      | 4,44E+08  |
| Isoform 5 of Caldesmon                                          | 13       | 61,2       | 4,39E+08  |
| Serine/threonine-protein phosphatase                            | 13       | 35,0       | 6,10E+07  |
| Isoform 2 of Filamin-C                                          | 12       | 287,3      | 3,28E+08  |
| Isoform 2 of Non-POU domain-containing octamer-binding protein  | 11       | 43,9       | 4,00E+08  |
| Tubulin beta-8 chain                                            | 11       | 49,8       | 3,52E+08  |
| Myosin-10                                                       | 11       | 229,0      | 1,37E+08  |
